# Supplementary material for: Controlled synthesis of ultrathin lamellar Eu2O3nanocrystals: self-assembly of 1D nanowires to 2D nanosheets
Source: Royal Society of Chemistry journal article supplement (doi:10.1039/c3cc43673j), 2013-01-01
Supplement: c3cc43673j.pdf [file c3cc43673j.pdf]

Supporting Information for

# Controlled Synthesis of Ultrathin Lamellar $\text{Eu}_2\text{O}_3$ Nanocrystals: Self-Assembly from 1D Nanowires to 2D Nanosheets

Yeteng Zhong,<sup>ab</sup> Yijun Yang,<sup>ab</sup> Ying Ma,<sup>\*ac</sup> and Jiannian Yao<sup>\*a</sup>

## Experimental section

*Materials.* 1, 5-pentanediol,  $\text{EuCl}_3$  and  $\text{Eu}_2\text{O}_3$  were purchased from Alfa Asea and used as received.  $\text{NaHCO}_3$  were purchased from Beijing Chemicals Corp., China, and used as received without further purification.

*Experimental.* In a typical synthesis of nanowires, 0.1 g  $\text{EuCl}_3$  and 0.25 g  $\text{NaHCO}_3$  were added to 18 ml 1, 5-pentanediol and stirred at room temperature for 30 min. The homogeneous solution was transferred into a 25 ml Teflon-lined autoclave. Then the autoclave was sealed and maintained at 90 °C for 10 h, and allowed to cool to room temperature naturally. The resulting product was repeatedly washed with ethanol, then dried at 60 °C for 3 h. 0.1 g as-synthesized nanowires sample was immersed into 10 ml deionized water for 10 min, 1 h and 24 h, and nanosheets with different lateral size in Figure S2 can be obtained.

*Characterization.* SEM images were taken with a field emission scanning electron microscope (FESEM, JSM-4300, JEOL, Japan). TEM images, HRTEM images, selected-area electron diffraction (SAED),

and an energy-dispersive X-ray (EDX) spectrum were taken with a high-resolution transmission electron microscope (HRTEM, JSM-2010, JEOL, Japan) operating at 200 kV and a transmission electron microscope (JSM-1011, JEOL, Japan) operating at 100 kV. X-ray diffraction (XRD) patterns were recorded on a Philips XPert PRO MPD X-ray diffractometer operated at 35 kV and 45 mA with Cu-K $\alpha$  radiation. Chemical bonding information was studied with FT-IR using Bruker EQUINOX55 with a potassium bromide (KBr) pellet technique. Each spectrum was collected after 32 scans at a resolution of 4 cm<sup>-1</sup> from 400 to 4000 cm<sup>-1</sup>. The TGA curves were obtained on a TG/DTA6300 thermoanalyzer. Room-temperature fluorescence spectra were recorded on a Hitachi F-7000 FL spectrophotometer. UV-Vis diffuse reflection spectra were taken on a Hitachi U-3010 spectrophotometer. Atomic force microscopy (AFM) studies were done with a BRUKE Veeco MultiMode 8 scanning probe microscope at tapping mode.

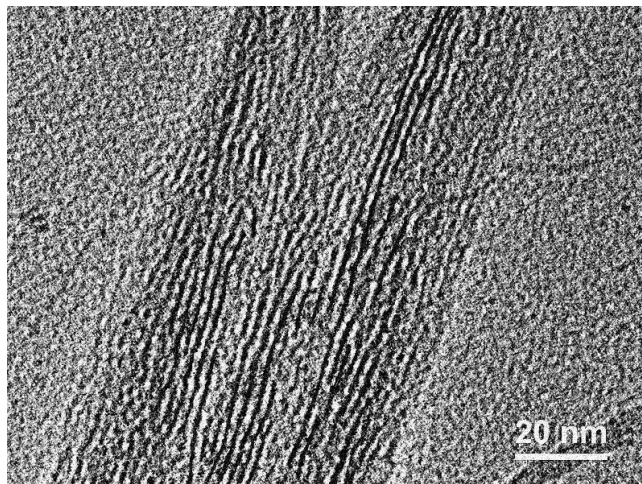

**Figure S1.** HRTEM image of Eu<sub>2</sub>O<sub>3</sub> nanowire bundles.

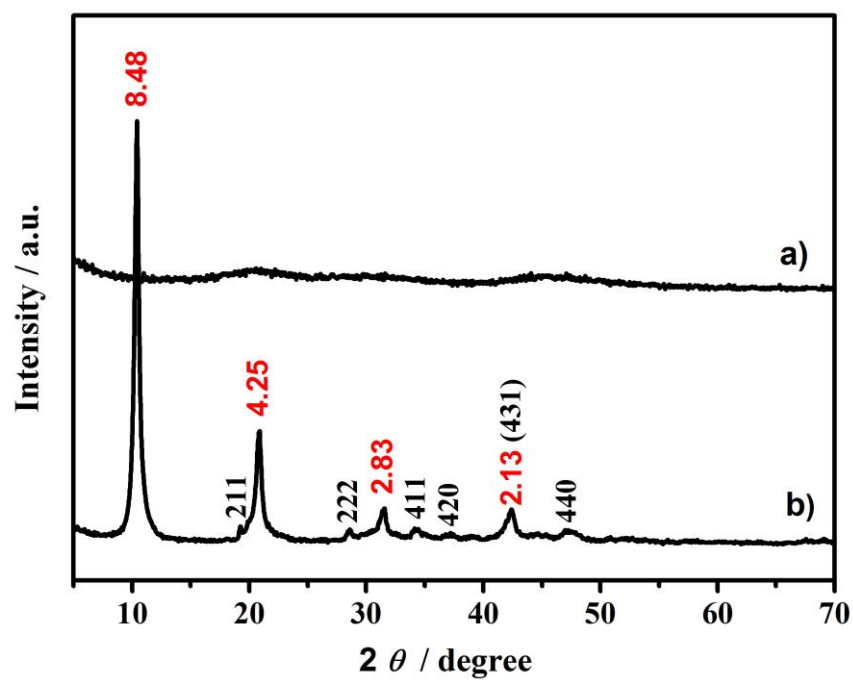

**Figure S2.** XRD patterns of the as-synthesized  $\text{Eu}_2\text{O}_3$  nanowires (a) and nanosheets (b).

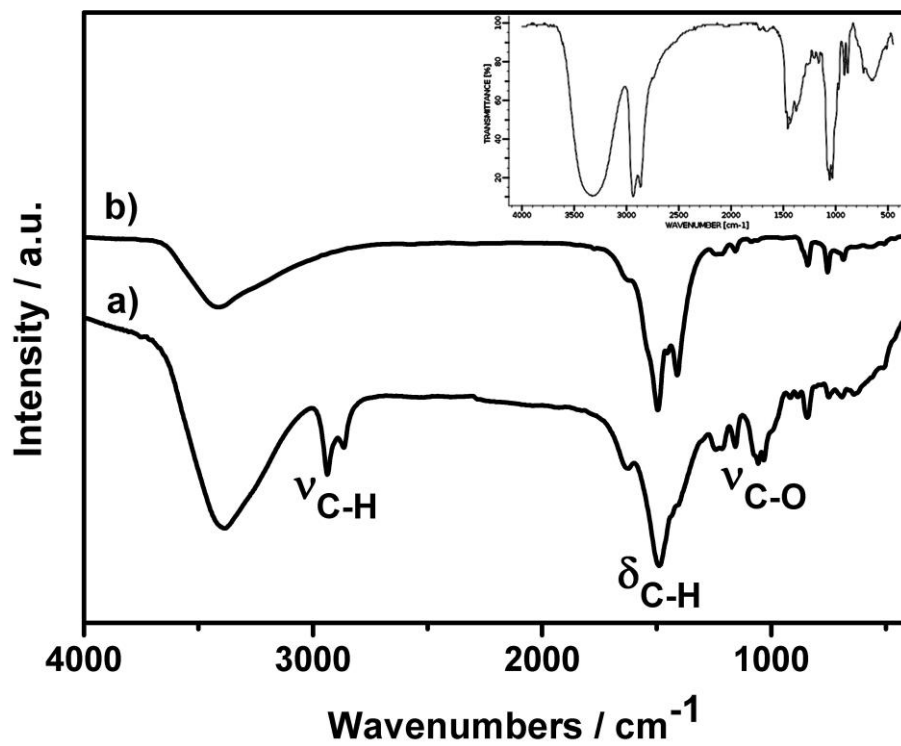

**Figure S3.** FT-IR spectra of the as-synthesized  $\text{Eu}_2\text{O}_3$  nanowires (a) and nanosheets (b). The inset shows IR spectrum of pure 1, 5-pentanediol.

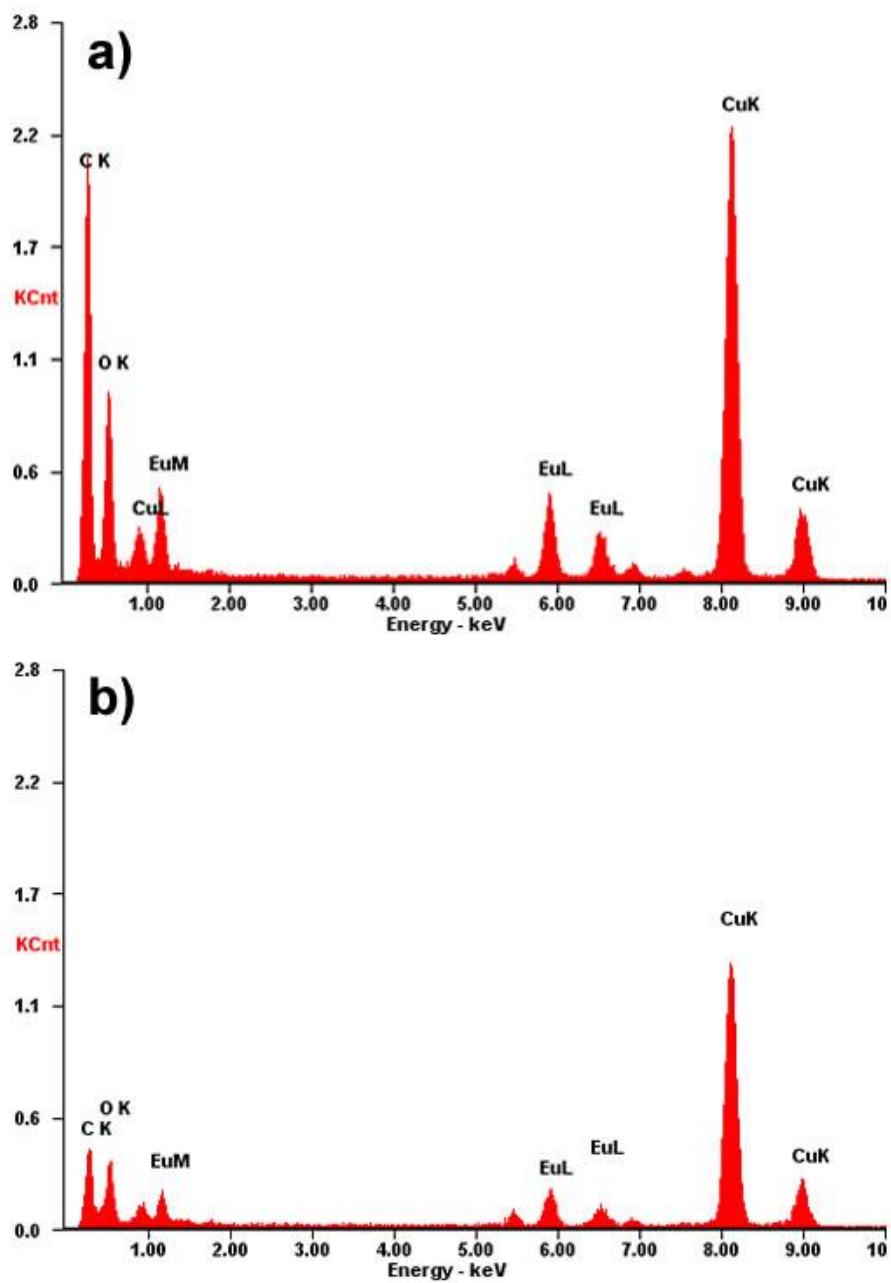

**Figure S4.** EDX spectra of the as-synthesized  $\text{Eu}_2\text{O}_3$  nanowires (a) and nanosheets (b).

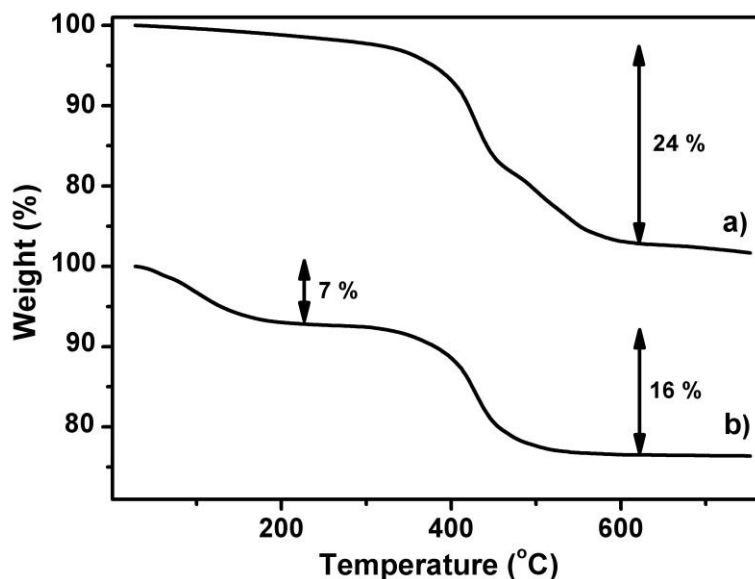

**Figure S5.** TGA curves of the as-synthesized  $\text{Eu}_2\text{O}_3$  nanowires (a) and nanosheets (b).

There is only one major zone of mass loss for  $\text{Eu}_2\text{O}_3$  nanowires in the range from 350 °C to 550 °C, which is attributed to the decomposition of pentanediol. While two major zones of mass loss can be observed in TGA curve of  $\text{Eu}_2\text{O}_3$  nanosheets. In addition to mass loss step similar to that of the nanowires, 7% mass loss ranging from room temperature to 150 °C is attributed to dehydration.



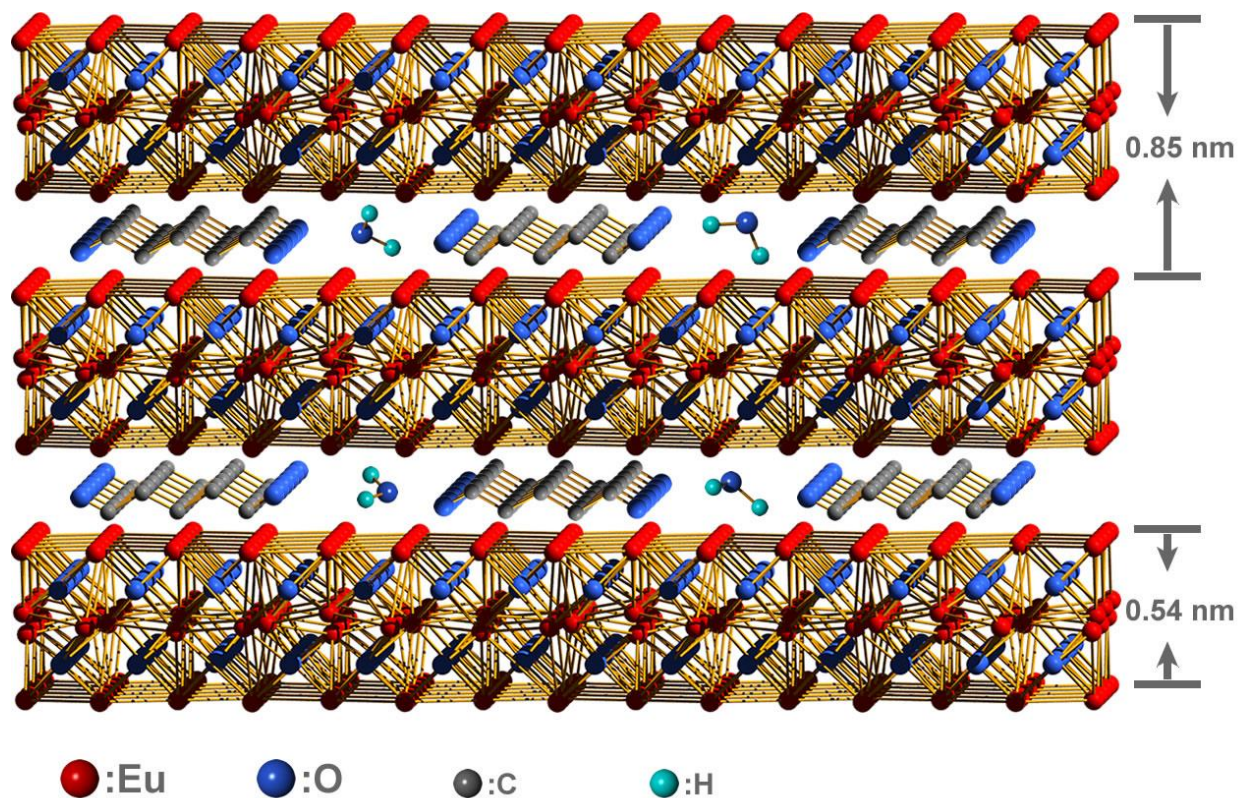

**Figure S6.** Schematic illustration of the Eu<sub>2</sub>O<sub>3</sub> nanosheet viewed along [001] zone axis. Red, blue, gray and green balls correspond to Eu, O, C, and H atoms, respectively. Hydrogen atoms in 1, 5-pentanediol are omitted for clarity.



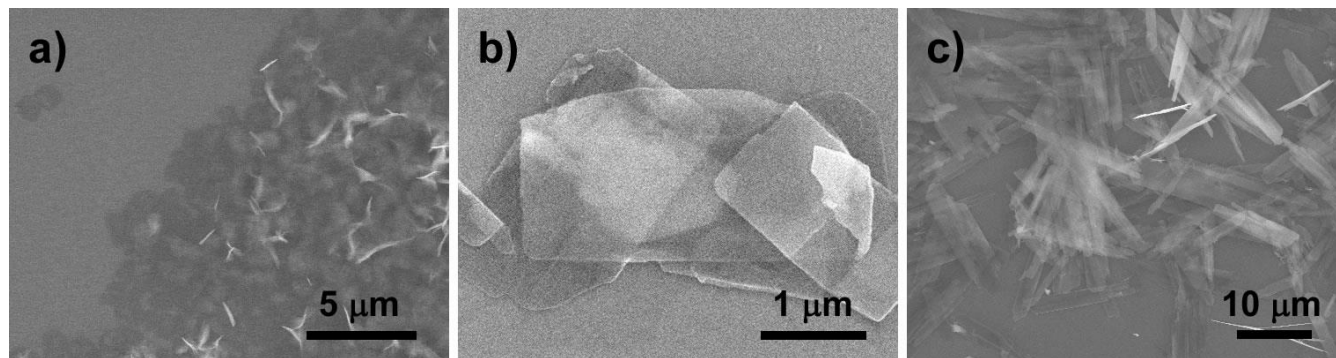

**Figure S7.** SEM images of  $\text{Eu}_2\text{O}_3$  nanosheets obtained from different soaking time: 10 min (a), 1 h (b), 24 h (c).

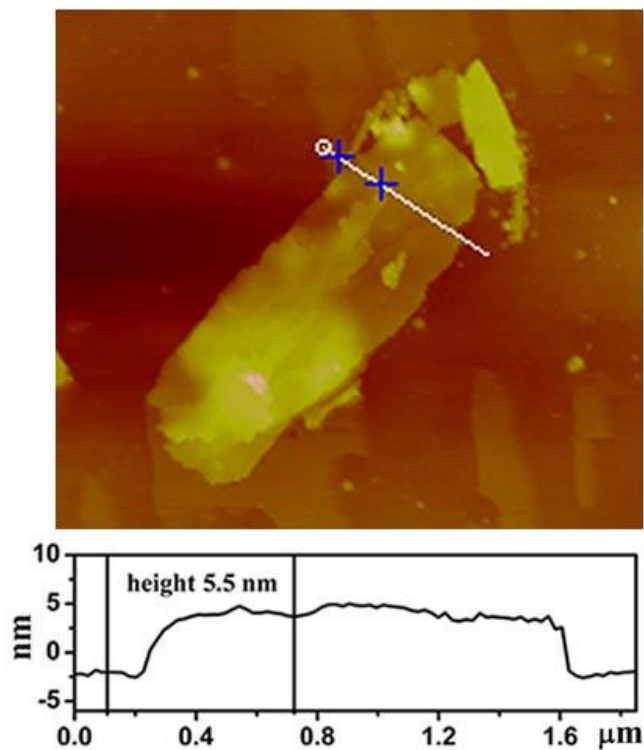

**Figure S8.** AFM image of  $\text{Eu}_2\text{O}_3$  nanosheets obtained from 24 h soaking in water.
